# Supplementary material for: Mesoporous amorphous TiO2 shell-coated ZIF-8 as an efficient and recyclable catalyst for transesterification to synthesize diphenyl carbonate
Source: Springer Nature journal article supplement (doi:10.1007/s10853-019-03595-5), 2019-04-09
Supplement: MOESM1 [file 16648306]

**Mesoporous amorphous TiO2 shell coated ZIF-8 as an efficient and recyclable catalyst for transesterification to synthesize diphenyl carbonate**

Bingying Jia1,2, Ping Cao3, Hua Zhang1,2, Gongying Wang1,2*

*1Chengdu Institute of Organic Chemistry, Chinese Academy of Sciences, Chengdu 610041, China;*

*2National Engineering Laboratory for VOCs Pollution Control Material & Technology, University of Chinese Academy of Sciences, Beijing 101408, China*

*3School of Chemical Engineering, Chongqing University of Technology, Chongqing 400054, China*

jby312@126.com; c.p-9@163.com; 56725775@qq.com;

**Corresponding author:** wanggongying1102@126.com





**Fig. S1** XRD patterns of ZIF-8@1.39TiO2-yHDA.

Table S1 ZIF-8@1.39TiO2-yHDA relative crystallinity

| Samples | Area under the curve | Relative crystallinity(%) |
| --- | --- | --- |
| ZIF-8@1.39TiO2-0HDA | 1042.54 | 43.53 |
| ZIF-8@1.39TiO2-0.1HDA | 1075.46 | 44.90 |
| ZIF-8@1.39TiO2-0.3HDA | 992.57 | 41.44 |
| ZIF-8@1.39TiO2-0.5HDA | 1006.19 | 42.01 |
| Simulated ZIF-8 | 2395.08 | 100 |

The relative crystallinity of samples was calculated with the following expression:


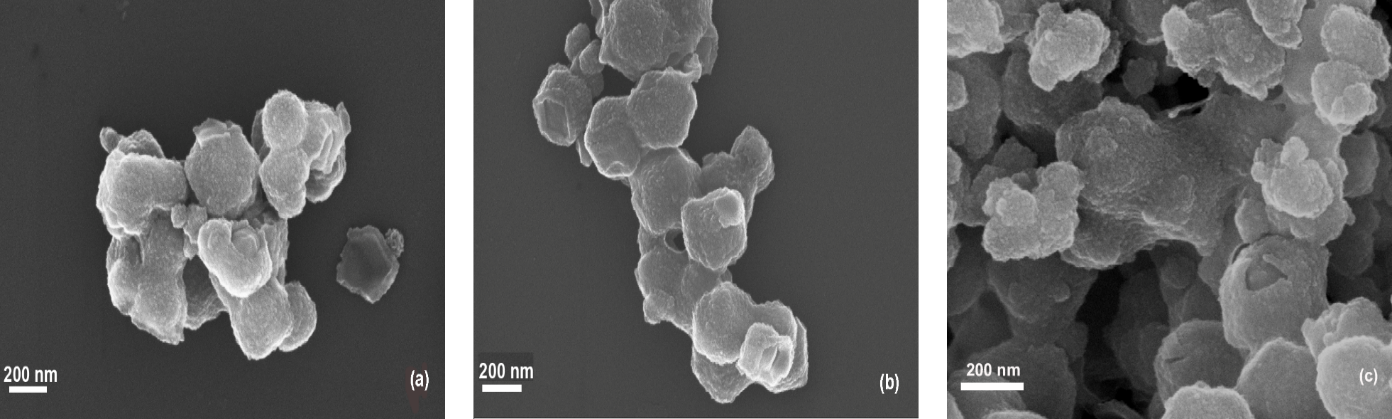


**Fig. S2** SEM images of (a) ZIF-8@1.39TiO2-0.1HDA-fresh; (b) ZIF-8@1.39TiO2-0.1HDA after 6 consecutive catalytic cycles; (c) ZIF-8@1.39TiO2-0.1HDA after 10 consecutive catalytic cycles.
